# Supplementary material
Source: publisher figshare collection journal article supplement (https://future-science-group.figshare.com/ndownloader/files/27699360)
Supplement: Supplementary file 1 [file 27699360]

**Supplementary file 1. “R” packages used in the analysis.**

R version 3.6.1 (2019-07-05)

Platform: x86_64-pc-linux-gnu (64-bit)

Running under: Ubuntu 18.04.3 LTS

attached base packages:

[1] grid stats4 parallel stats graphics grDevices utils datasets methods

[10] base

other attached packages:

[1] pander_0.6.3

[2] SmartSVA_0.1.3

[3] RSpectra_0.15-0

[4] isva_1.9

[5] JADE_2.0-2

[6] fastICA_1.2-2

[7] qvalue_2.16.0

[8] sva_3.32.1

[9] genefilter_1.66.0

[10] mgcv_1.8-30

[11] nlme_3.1-142

[12] ellipse_0.4.1

[13] Cairo_1.5-10

[14] reshape_0.8.8

[15] svd_0.5

[16] lumi_2.36.0

[17] preprocessCore_1.46.0

[18] fields_9.9

[19] maps_3.3.0

[20] spam_2.4-0

[21] dotCall64_1.0-0

[22] affy_1.62.0

[23] vsn_3.52.0

[24] limma_3.40.6

[25] doParallel_1.0.15

[26] minfiData_0.30.0

[27] IlluminaHumanMethylation450kanno.ilmn12.hg19_0.6.0

[28] IlluminaHumanMethylation450kmanifest_0.4.0

[29] MEAL_1.14.0

[30] MethylAid_1.18.0

[31] org.Hs.eg.db_3.8.2

[32] AnnotationDbi_1.46.1

[33] clusterProfiler_3.12.0

[34] MultiDataSet_1.12.0

[35] psych_1.8.12

[36] doBy_4.6-3

[37] plyr_1.8.4

[38] gmodels_2.18.1

[39] haven_2.2.0

[40] quadprog_1.5-7

[41] GEOquery_2.52.0

[42] ggpmisc_0.3.1

[43] minfi_1.30.0

[44] bumphunter_1.26.0

[45] locfit_1.5-9.1

[46] iterators_1.0.12

[47] foreach_1.4.7

[48] Biostrings_2.52.0

[49] XVector_0.24.0

[50] SummarizedExperiment_1.14.1

[51] DelayedArray_0.10.0

[52] BiocParallel_1.18.1

[53] matrixStats_0.55.0

[54] Biobase_2.44.0

[55] GenomicRanges_1.36.1

[56] GenomeInfoDb_1.20.0

[57] IRanges_2.18.3

[58] S4Vectors_0.22.1

[59] BiocGenerics_0.30.0

[60] methylclock_0.5.0

[61] GAprediction_1.10.0

[62] forcats_0.4.0

[63] stringr_1.4.0

[64] dplyr_0.8.3

[65] purrr_0.3.3

[66] readr_1.3.1

[67] tidyr_1.0.0

[68] tibble_2.1.3

[69] ggplot2_3.2.1

[70] tidyverse_1.2.1

[71] missMethyl 1.24.0

[72] missMethyl 1.24.0
